# Supplementary material for: Prediction of a key role of motifs binding E2F and NR2F in down-regulation of numerous genes during the development of the mouse hippocampus
Source: PubMed Central journal article supplement (PMC1560171; doi:10.1186/1471-2105-7-367), 2006-08-02

## A. Sequences

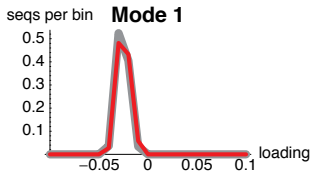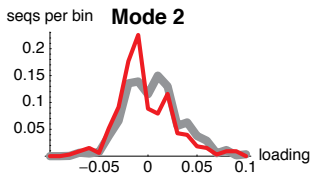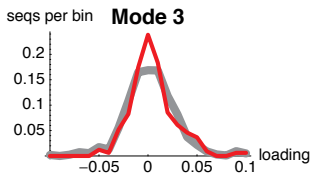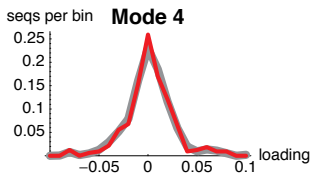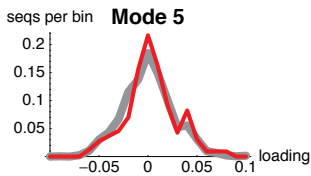

## B. Genes

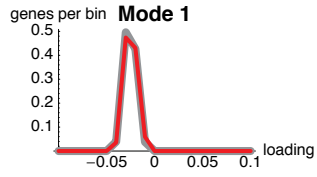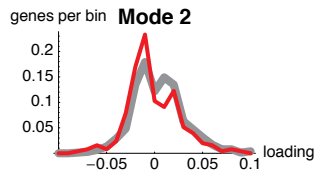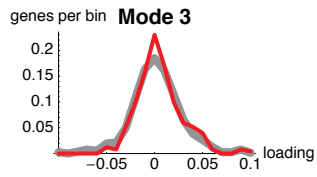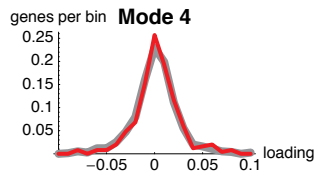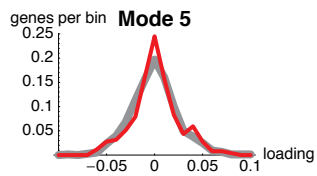

Supplement: 1471-2105-7-367-S1.pdf [file 1471-2105-7-367-S1.pdf]
